# Supplementary material for: α-Tocotrienol and Redox-Silent Analogs of Vitamin E Enhances Bortezomib Sensitivity in Solid Cancer Cells through Modulation of NFE2L1
Source: MDPI journal article supplement (doi:10.3390/ijms24119382), 2023-05-27
Supplement: s1 [file s1]

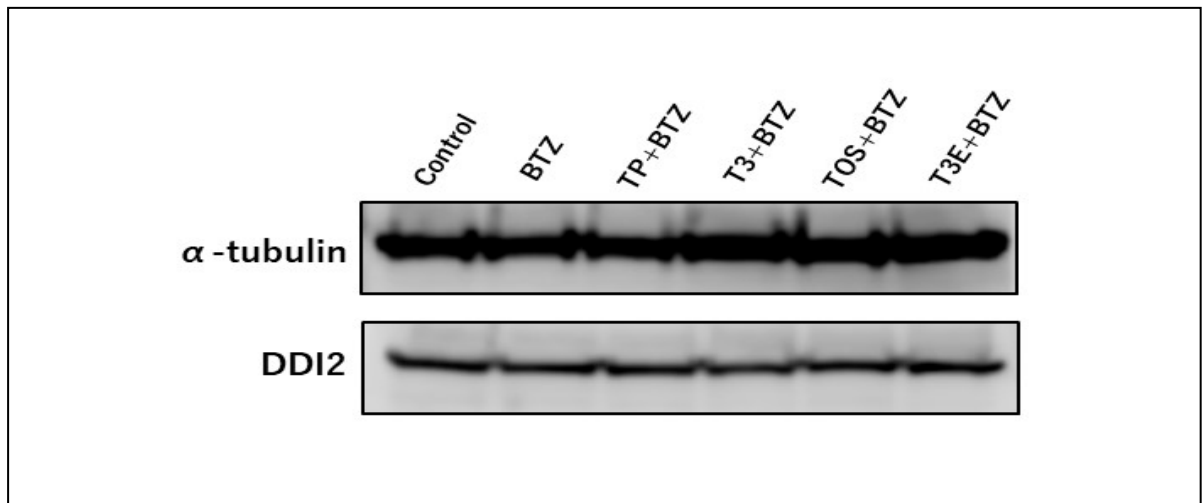

**Figure S1.** Effect of vitamin E alone on proteasome activity.

H2452 cells were treated with bortezomib 50 nM, TP 20  $\mu$ M, T3 20  $\mu$ M, TOS 20  $\mu$ M, and, T3E 20  $\mu$ M for 12 h. After the treatment, ubiquitinated protein levels in each sample were assessed by immunoblotting.  $\alpha$ -Tubulin protein levels served as the loading control. Results are representative of three independent experiments. BTZ; Bortezomib, TP;  $\alpha$ -tocopherol, T3;  $\alpha$ -tocotrienol, TOS;  $\alpha$ -tocopheryl succinate, T3E; 6-O-Carboxypropyl- $\alpha$ -tocotrienol.
